# Supplementary material for: Graphic Warning Labels Elicit Affective and Thoughtful Responses from Smokers: Results of a Randomized Clinical Trial
Source: PLOS journal article supplement (doi:10.1371/journal.pone.0142879), 2015-12-16

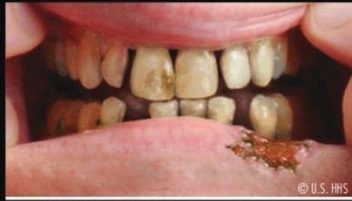

**WARNING:**  
Cigarettes cause cancer.

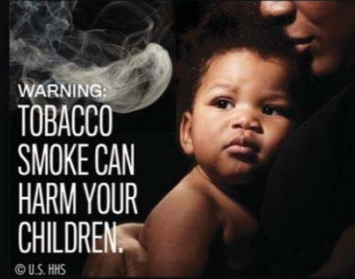

**WARNING:**  
TOBACCO  
SMOKE CAN  
HARM YOUR  
CHILDREN.

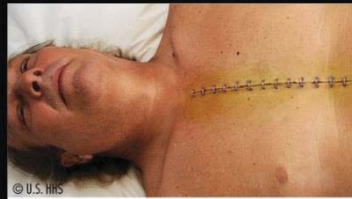

**WARNING:**  
Smoking can kill you.

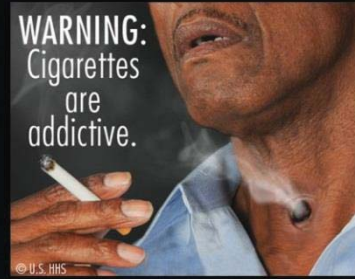

**WARNING:**  
Cigarettes  
are  
addictive.

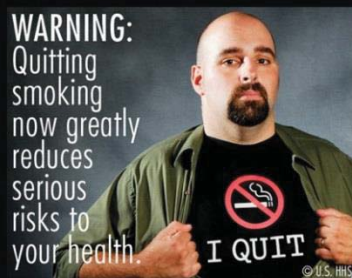

**WARNING:**  
Quitting  
smoking  
now greatly  
reduces  
serious  
risks to  
your health.

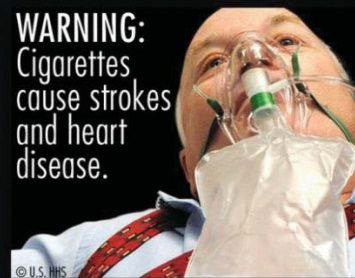

**WARNING:**  
Cigarettes  
cause strokes  
and heart  
disease.

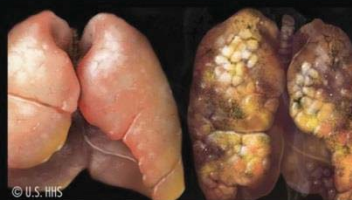

**WARNING:** Cigarettes  
cause fatal lung disease.

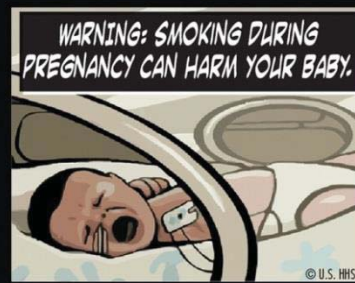

**WARNING: SMOKING DURING  
PREGNANCY CAN HARM YOUR BABY.**

**WARNING:**  
Tobacco smoke  
causes fatal  
lung disease  
in nonsmokers.

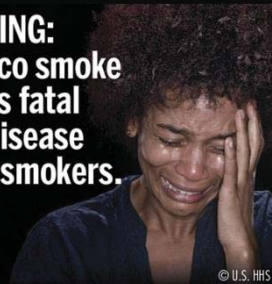

Supplement: S3 (10.1371/journal.pone.0142879.s003) [file journal.pone.0142879.s003]
