# Supplementary material for: Graphic Warning Labels Elicit Affective and Thoughtful Responses from Smokers: Results of a Randomized Clinical Trial
Source: PLOS journal article supplement (doi:10.1371/journal.pone.0142879), 2015-12-16

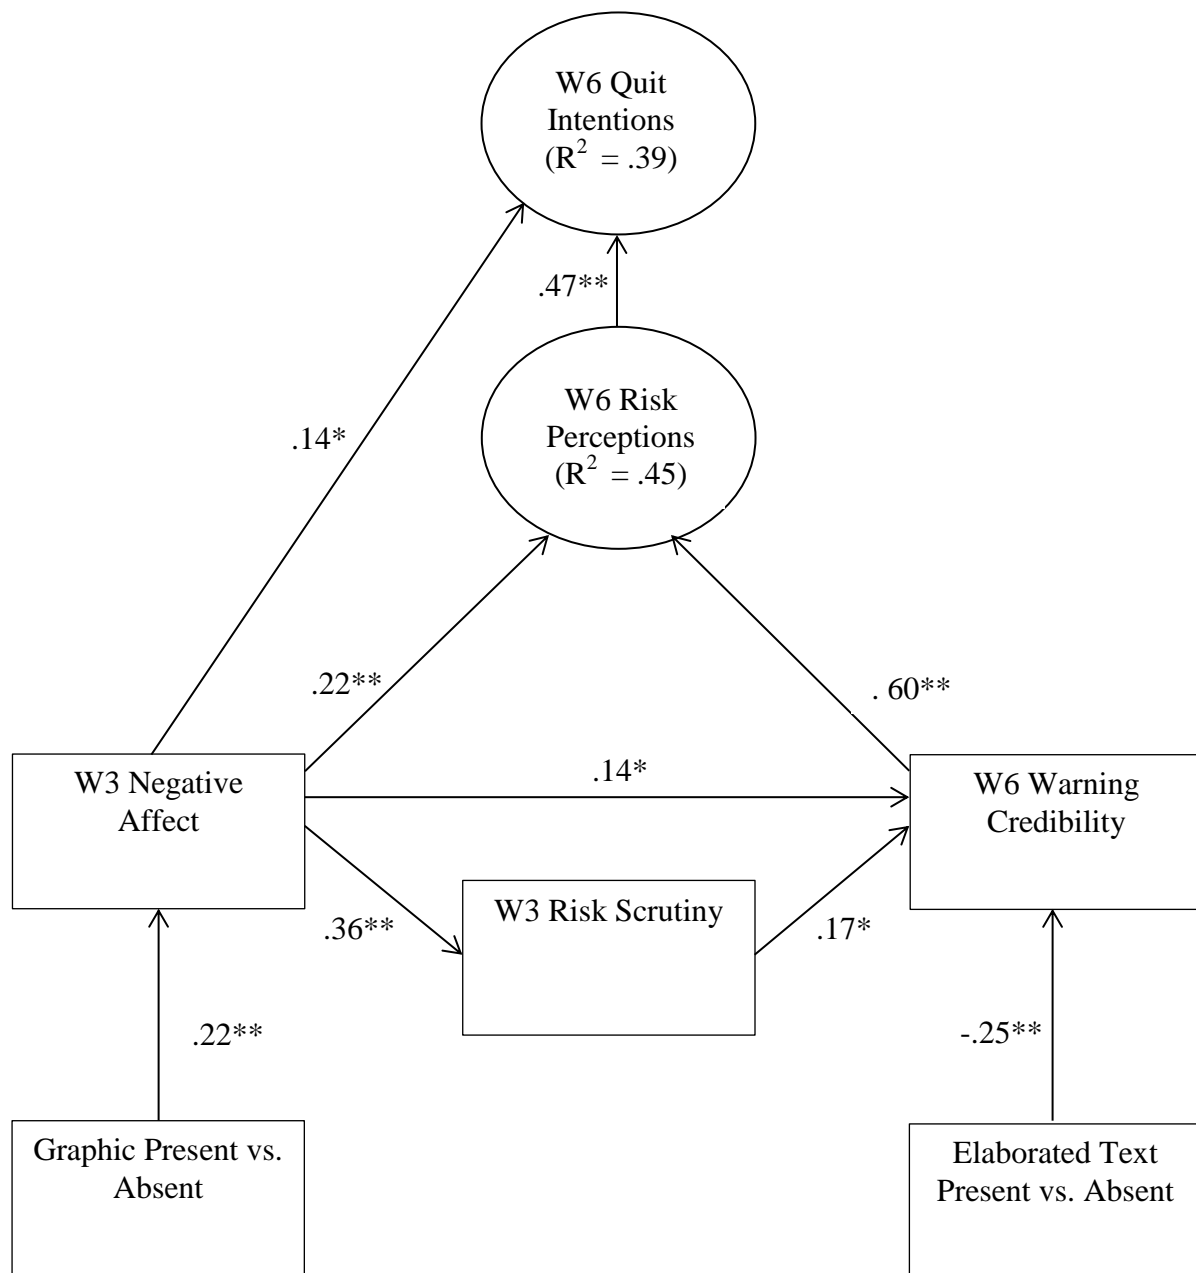

Supplement: S5 (10.1371/journal.pone.0142879.s005) [file journal.pone.0142879.s005]
